# Supplementary material
Source: PubMed Central journal article supplement (PMC6261492)
Supplement: NIHMS973384-supplement-supplement_1.pdf [file NIHMS973384-supplement-supplement_1.pdf]

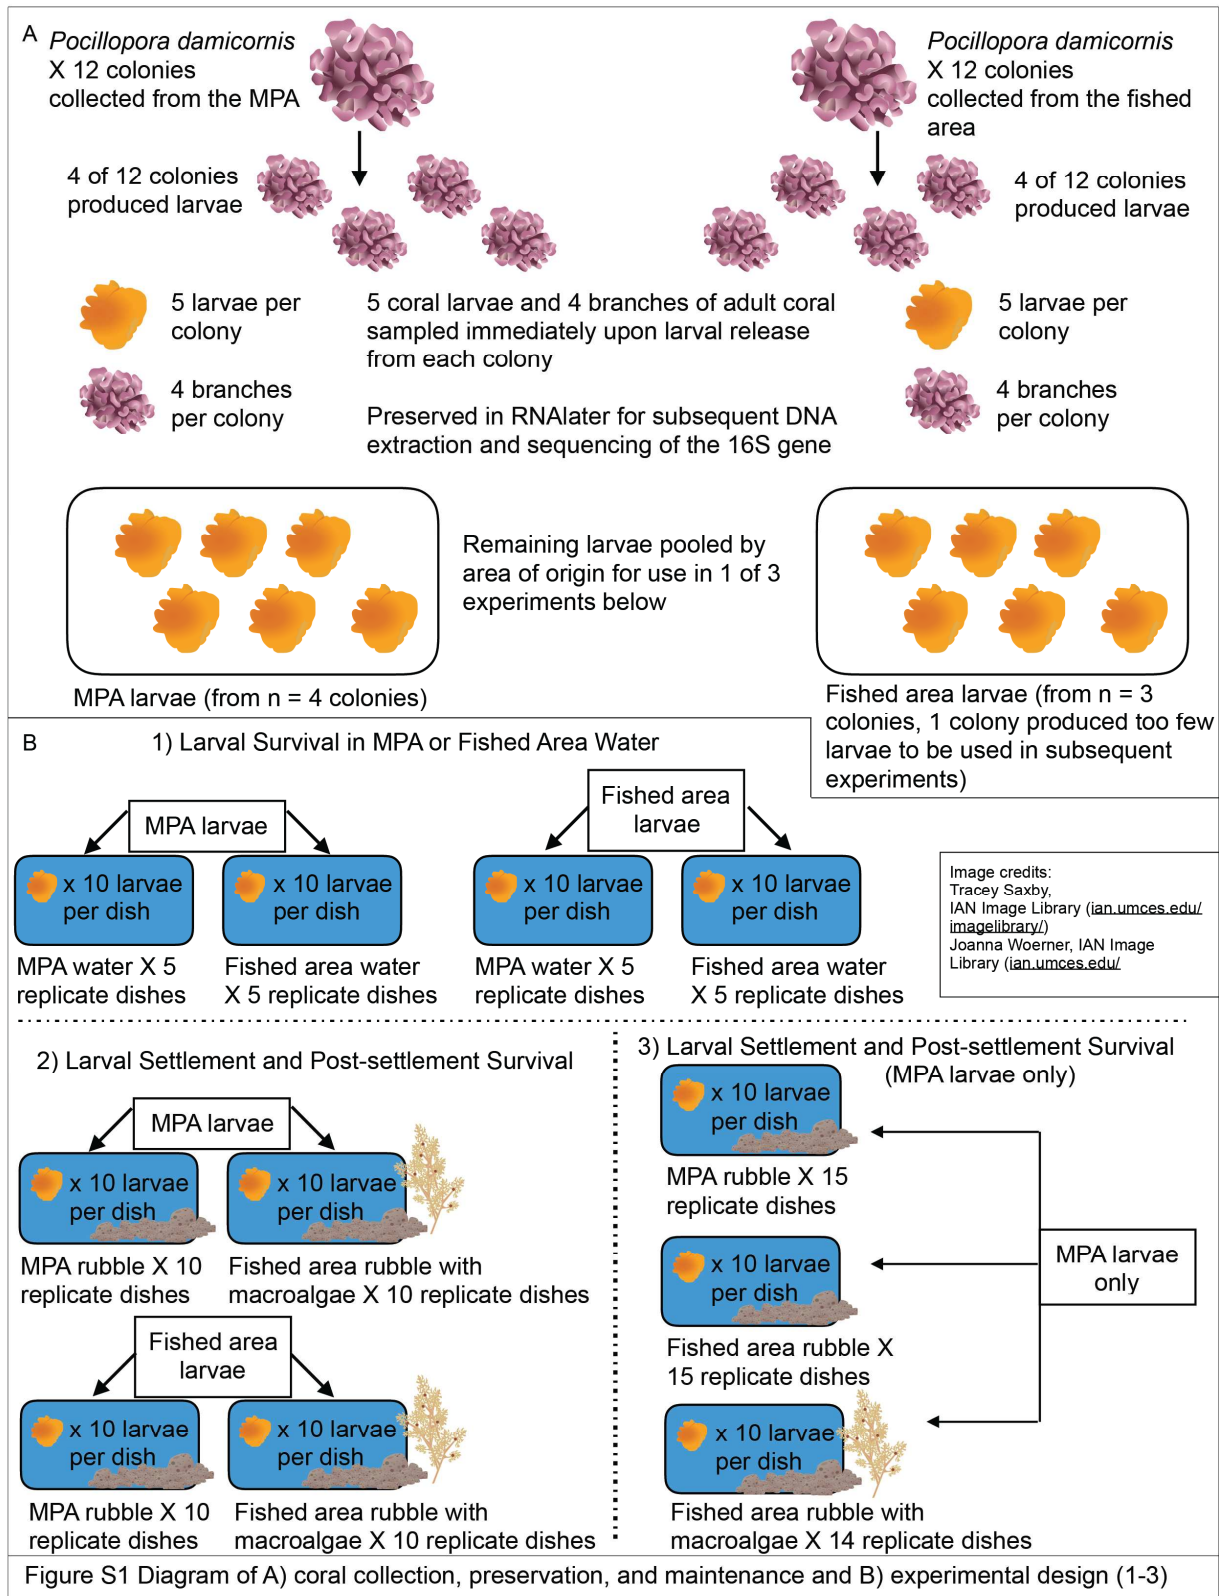

1026 Figure S2:

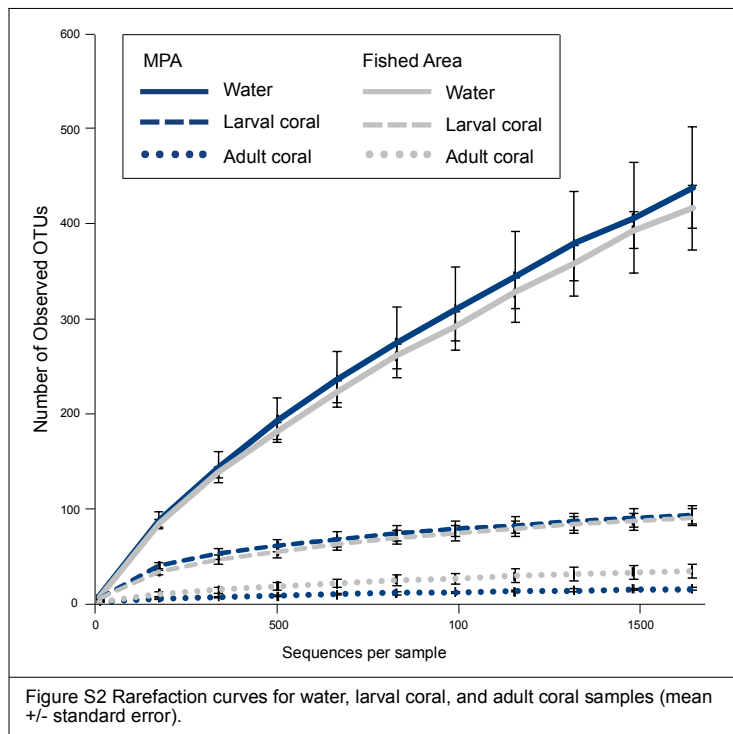

1027

1028

1029

1030

1031

1032

1033

1034

1035

1036

1037

1038

1039

1040 Figure S3:

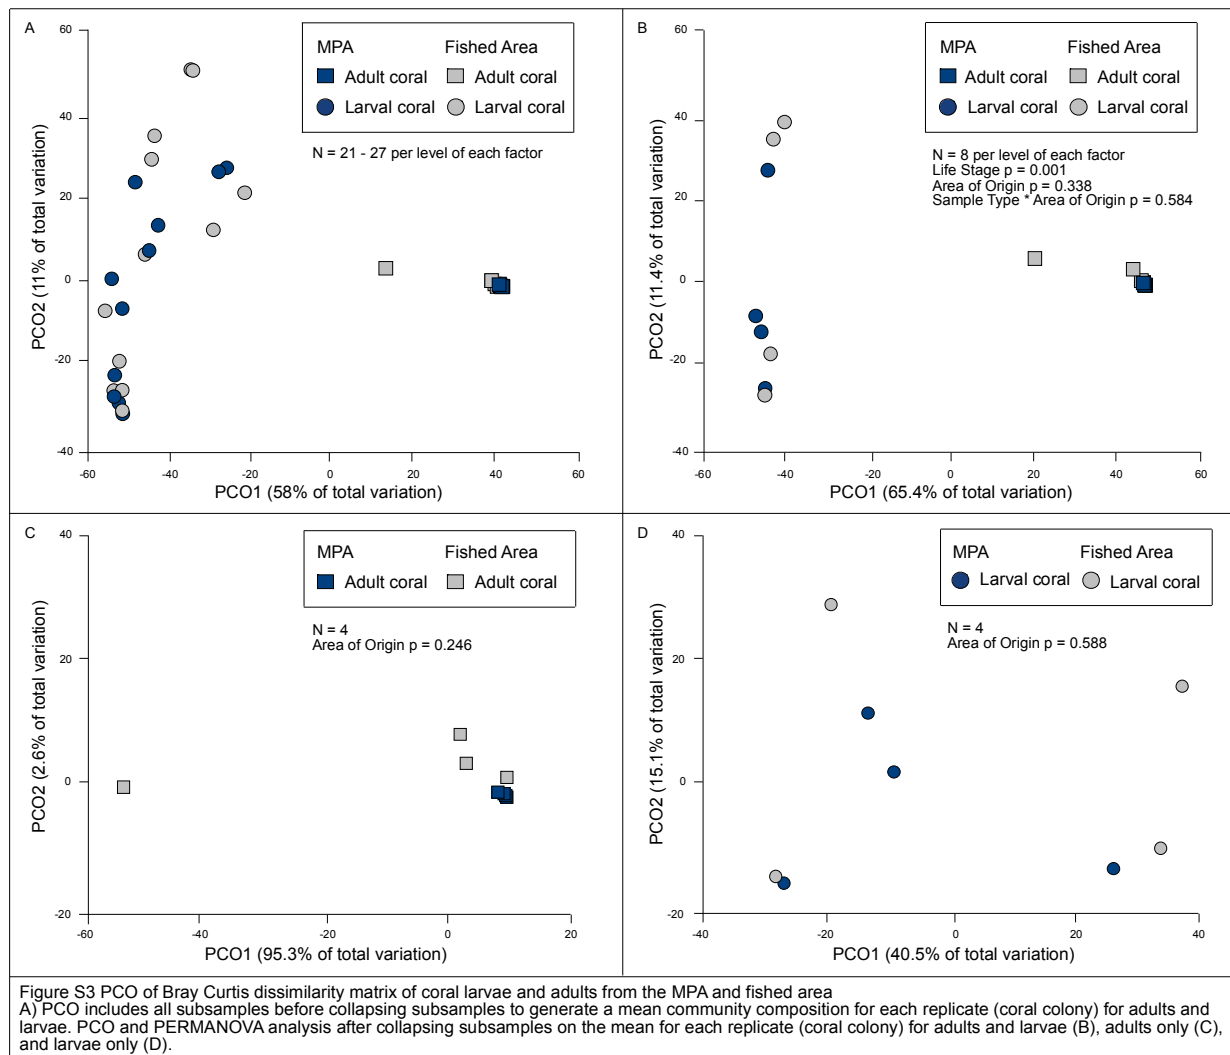

1041

1042

1043 Table 1:

Table 1. Repeated measures ANOVA on A) square root transformed settlement of larvae (originating from the MPA or fished area) on substrate from the MPA (no macroalgae) or fished area with macroalgae and B) survival of recently settled juvenile corals over 26 days on the reef. Juveniles that settled on MPA substrate were out-planted to the MPA and juveniles that settled on the fished area substrate were out-planted to the fished area.

| A | Source                                                   | DF | F Ratio | P       |
|---|----------------------------------------------------------|----|---------|---------|
|   | Larval Area of Origin                                    | 1  | 15.75   | < 0.001 |
|   | Substrate Type                                           | 1  | 5.95    | 0.020   |
|   | Time                                                     | 1  | 31.62   | < 0.001 |
|   | Larval Area of Origin*Substrate Type                     | 1  | 2.10    | 0.156   |
|   | Larval Area of Origin*Time                               | 1  | 14.26   | < 0.001 |
|   | Substrate Type*Time                                      | 1  | 7.40    | 0.010   |
|   | Larval Area of Origin*Substrate Type*Time                | 1  | 3.72    | 0.062   |
| B | Source                                                   | DF | F Ratio | P       |
|   | Larval Area of Origin                                    | 1  | 8.16    | 0.007   |
|   | Substrate Out-plant Treatment                            | 1  | 46.39   | < 0.001 |
|   | Time                                                     | 2  | 446.69  | < 0.001 |
|   | Larval Area of Origin*Substrate Out-plant Treatment      | 1  | 0.77    | 0.387   |
|   | Larval Area of Origin*Time                               | 2  | 4.67    | 0.013   |
|   | Substrate Out-plant Treatment*Time                       | 2  | 22.53   | < 0.001 |
|   | Larval Area of Origin*Substrate Out-plant Treatment*Time | 2  | 1.15    | 0.322   |

1044

1045 Table S1:

| Table S1 PERMDISPERSION distance from centroid means and pairwise comparison permutation p values |                             |                |
|---------------------------------------------------------------------------------------------------|-----------------------------|----------------|
|                                                                                                   | Mean distance from centroid | Standard error |
| MPA adult                                                                                         | 2.426                       | 0.327          |
| Fished area adult                                                                                 | 22.453                      | 7.065          |
| MPA larvae                                                                                        | 36.181                      | 2.214          |
| Fished area larvae                                                                                | 40.614                      | 1.084          |
| Pairwise comparisons                                                                              |                             |                |
| Group 1                                                                                           | Group 2                     | p(perm)        |
| MPA adult                                                                                         | Fished area adult           | 0.037          |
| MPA adult                                                                                         | MPA larvae                  | 0.026          |
| MPA adult                                                                                         | Fished area larvae          | 0.015          |
| MPA larvae                                                                                        | Fished area adult           | 0.247          |
| MPA larvae                                                                                        | Fished area larvae          | 0.083          |
| Fished area adult                                                                                 | Fished area larvae          | 0.179          |

1046

1047

1048

1049

1050

1051

1052

1053 Table S2:

| Table S2A Fold Changes in Relative Abundances                                                                                                                                |                                                                                  |                                                                                  |                                                                |
|------------------------------------------------------------------------------------------------------------------------------------------------------------------------------|----------------------------------------------------------------------------------|----------------------------------------------------------------------------------|----------------------------------------------------------------|
| In bold type font are taxa that significantly differ between adults and larvae                                                                                               |                                                                                  |                                                                                  |                                                                |
| * taxa contributes to less than 2% of the community                                                                                                                          |                                                                                  |                                                                                  |                                                                |
| ** classified up to order                                                                                                                                                    |                                                                                  |                                                                                  |                                                                |
| *** only present in coral larvae                                                                                                                                             |                                                                                  |                                                                                  |                                                                |
| A. Taxa enriched in adult coral                                                                                                                                              | Average relative proportion abundance in adult corals (MPA + fished area adults) | Average relative proportion abundance in coral larvae (MPA + fished area larvae) | Fold change in relative proportion abundance (adult/larvae)    |
| <b>Endozoicimonaceae</b>                                                                                                                                                     | 0.90202                                                                          | 0.06656                                                                          | 12.55                                                          |
| Pseudoalteromonadaceae                                                                                                                                                       | 0.01092                                                                          | 0.00231                                                                          | 3.73                                                           |
| Alteromonadaceae                                                                                                                                                             | 0.04658                                                                          | 0.02022                                                                          | 1.30                                                           |
| B. Taxa enriched in coral larvae                                                                                                                                             | Average relative proportion abundance in coral larvae (MPA + fished area larvae) | Average relative proportion abundance in adult coral (MPA + fished area adults)  | Fold change in relative proportion abundance (larvae/adults)   |
| <b>Helicobacteraceae</b>                                                                                                                                                     | 0.01953                                                                          | 0.00008                                                                          | 243.13                                                         |
| <b>Methylobacteriaceae</b>                                                                                                                                                   | 0.02044                                                                          | 0.00014                                                                          | 145.00                                                         |
| Thiohalorhabdaceae                                                                                                                                                           | 0.01708                                                                          | 0.00013                                                                          | 130.38                                                         |
| Comamonadaceae                                                                                                                                                               | 0.01783                                                                          | 0.00015                                                                          | 117.87                                                         |
| <b>Low abundance archaea*</b>                                                                                                                                                | 0.02087                                                                          | 0.00023                                                                          | 89.74                                                          |
| <b>Sphingomonadaceae</b>                                                                                                                                                     | 0.02270                                                                          | 0.00033                                                                          | 67.79                                                          |
| <b>Chromatiales**</b>                                                                                                                                                        | 0.35638                                                                          | 0.00595                                                                          | 58.90                                                          |
| <b>Pseudomonadaceae</b>                                                                                                                                                      | 0.08598                                                                          | 0.00147                                                                          | 57.49                                                          |
| Moraxellaceae                                                                                                                                                                | 0.06503                                                                          | 0.00270                                                                          | 23.09                                                          |
| Oceanospirillaceae                                                                                                                                                           | 0.02707                                                                          | 0.00127                                                                          | 20.31                                                          |
| <b>Low abundance bacteria*</b>                                                                                                                                               | 0.22581                                                                          | 0.02555                                                                          | 7.84                                                           |
| Unassigned taxa                                                                                                                                                              | 0.01331                                                                          | 0.00249                                                                          | 4.35                                                           |
| Bacillaceae***                                                                                                                                                               | 0.01887                                                                          | 0.00000                                                                          |                                                                |
| C. Taxa enriched in MPA corals                                                                                                                                               | Average relative proportion abundance in MPA corals (adults & larvae)            | Average relative proportion abundance fished area coral (adults & larvae)        | Fold change in relative proportion abundance (MPA/fished area) |
| Oceanospirillaceae                                                                                                                                                           | 0.02386                                                                          | 0.00448                                                                          | 4.33                                                           |
| Unassigned taxa                                                                                                                                                              | 0.01211                                                                          | 0.00369                                                                          | 2.28                                                           |
| Thiohalorhabdaceae                                                                                                                                                           | 0.01263                                                                          | 0.00458                                                                          | 1.76                                                           |
| Comamonadaceae                                                                                                                                                               | 0.01140                                                                          | 0.00658                                                                          | 0.73                                                           |
| Methylobacteriaceae                                                                                                                                                          | 0.01211                                                                          | 0.00847                                                                          | 0.43                                                           |
| Helicobacteraceae                                                                                                                                                            | 0.01124                                                                          | 0.00836                                                                          | 0.34                                                           |
| Low abundance archaea*                                                                                                                                                       | 0.01201                                                                          | 0.00909                                                                          | 0.32                                                           |
| Chromatiales**                                                                                                                                                               | 0.20548                                                                          | 0.15684                                                                          | 0.31                                                           |
| Endozoicimonaceae                                                                                                                                                            | 0.49837                                                                          | 0.47021                                                                          | 0.06                                                           |
| D. Taxa enriched in fished area corals                                                                                                                                       | Average relative proportion abundance in MPA corals (adults & larvae)            | Average relative proportion abundance fished area coral (adults & larvae)        | Fold change in relative proportion abundance (MPA/fished area) |
| Bacillaceae***                                                                                                                                                               | 0.01870                                                                          | 0.00017                                                                          | 109.00                                                         |
| Pseudoalteromonadaceae                                                                                                                                                       | 0.01284                                                                          | 0.00039                                                                          | 31.92                                                          |
| Alteromonadaceae                                                                                                                                                             | 0.05239                                                                          | 0.01441                                                                          | 2.64                                                           |
| Sphingomonadaceae                                                                                                                                                            | 0.01674                                                                          | 0.00629                                                                          | 1.66                                                           |
| Moraxellaceae                                                                                                                                                                | 0.04155                                                                          | 0.02618                                                                          | 0.59                                                           |
| Pseudomonadaceae                                                                                                                                                             | 0.05182                                                                          | 0.03563                                                                          | 0.45                                                           |
| Low abundance bacteria*                                                                                                                                                      | 0.13365                                                                          | 0.11771                                                                          | 0.14                                                           |
| Table S2B Two-Factor ANOVA or permutation ANOVA p values                                                                                                                     |                                                                                  |                                                                                  |                                                                |
| In bold type font are taxa that significantly differ between adults and larvae (p < 0.004 for statistical significance with Bonferroni correction for multiple comparisons). |                                                                                  |                                                                                  |                                                                |
| Permutation ANOVA p values are provided for taxa that are not homoscedastic. Taxa that are not homoscedastic are in <i>italics</i> .                                         |                                                                                  |                                                                                  |                                                                |
|                                                                                                                                                                              | Area of origin                                                                   | Life stage                                                                       | Area of origin * Life stage                                    |
| <b>Low Abundance Archaea</b>                                                                                                                                                 | 0.8431                                                                           | <b>0.0018</b>                                                                    | 0.6863                                                         |
| <b>Low Abundance Bacteria</b>                                                                                                                                                | 0.6667                                                                           | <b>0.0006</b>                                                                    | 0.9020                                                         |
| <i>Unassigned</i>                                                                                                                                                            | 0.5102                                                                           | 0.1901                                                                           | 0.0727                                                         |
| Bacillaceae                                                                                                                                                                  | 0.3220                                                                           | 0.3140                                                                           | 0.3220                                                         |
| <b>Methylobacteriaceae</b>                                                                                                                                                   | 0.6230                                                                           | <b>0.0010</b>                                                                    | 0.6429                                                         |
| <b>Sphingomonadaceae</b>                                                                                                                                                     | 0.2927                                                                           | <b>0.0002</b>                                                                    | 0.2508                                                         |
| Comamonadaceae                                                                                                                                                               | 0.5389                                                                           | 0.0386                                                                           | 0.5142                                                         |
| <b>Helicobacteraceae</b>                                                                                                                                                     | 0.6154                                                                           | <b>0.0024</b>                                                                    | 0.5811                                                         |
| Alteromonadaceae                                                                                                                                                             | 0.3820                                                                           | 0.5400                                                                           | 0.2160                                                         |
| <b>Chromatiales</b>                                                                                                                                                          | 0.3438                                                                           | <b>0.0004</b>                                                                    | 0.3223                                                         |
| Endozoicimonaceae                                                                                                                                                            | 0.7220                                                                           | <b>&lt;0.0001</b>                                                                | 0.1130                                                         |
| Moraxellaceae                                                                                                                                                                | 0.3300                                                                           | 0.0042                                                                           | 0.7255                                                         |
| <b>Pseudomonadaceae</b>                                                                                                                                                      | 0.5102                                                                           | <b>0.0026</b>                                                                    | 0.6545                                                         |
| Oceanospirillaceae                                                                                                                                                           | 0.3380                                                                           | 0.209                                                                            | 0.3060                                                         |
| Thiohalorhabdaceae                                                                                                                                                           | 0.1343                                                                           | 0.0040                                                                           | 0.0808                                                         |
| Pseudoalteromonadaceae                                                                                                                                                       | 0.164                                                                            | 0.325                                                                            | 0.3                                                            |

1055 Table S3:

| Table S3A One-Factor (area of origin) ANOVA or permutation ANOVA p values for adult coral  |                            |
|--------------------------------------------------------------------------------------------|----------------------------|
| Permutation ANOVA p values are provided for taxa that are not homoscedastic.               |                            |
| Taxa that are not homoscedastic are in italics.                                            |                            |
|                                                                                            | Area of origin             |
| Low Abundance Archaea                                                                      | 0.537                      |
| Low Abundance Bacteria                                                                     | 0.243                      |
| Unassigned                                                                                 | 0.153                      |
| Bacillaceae                                                                                | Not present in adult coral |
| <i>Methylobacteriaceae</i>                                                                 | 0.246                      |
| <i>Sphingomonadaceae</i>                                                                   | 0.143                      |
| <i>Comamonadaceae</i>                                                                      | 0.356                      |
| <i>Helicobacteraceae</i>                                                                   | 0.356                      |
| <i>Alteromonadaceae</i>                                                                    | 0.293                      |
| Chromatiales                                                                               | 0.348                      |
| <i>Endozoicimonaceae</i>                                                                   | 0.265                      |
| <i>Moraxellaceae</i>                                                                       | 0.315                      |
| <i>Pseudomonadaceae</i>                                                                    | 0.344                      |
| <i>Oceanospirillaceae</i>                                                                  | 0.104                      |
| <i>Thiohalorhabdaceae</i>                                                                  | 0.237                      |
| <i>Pseudoalteromonadaceae</i>                                                              | 0.239                      |
| Table S3B One-Factor (area of origin) ANOVA or permutation ANOVA p values for larval coral |                            |
| Permutation ANOVA p values are provided for taxa that are not homoscedastic.               |                            |
| Taxa that are not homoscedastic are in italics.                                            |                            |
|                                                                                            | Area of origin             |
| Low Abundance Archaea                                                                      | 0.634                      |
| Low Abundance Bacteria                                                                     | 0.835                      |
| Unassigned                                                                                 | 0.141                      |
| Bacillaceae                                                                                | 0.342                      |
| <i>Methylobacteriaceae</i>                                                                 | 0.57                       |
| <i>Sphingomonadaceae</i>                                                                   | 0.266                      |
| <i>Comamonadaceae</i>                                                                      | 0.538                      |
| <i>Helicobacteraceae</i>                                                                   | 0.576                      |
| <i>Alteromonadaceae</i>                                                                    | 0.501                      |
| Chromatiales                                                                               | 0.439                      |
| <i>Endozoicimonaceae</i>                                                                   | 0.255                      |
| <i>Moraxellaceae</i>                                                                       | 0.534                      |
| <i>Pseudomonadaceae</i>                                                                    | 0.614                      |
| <i>Oceanospirillaceae</i>                                                                  | 0.341                      |
| <i>Thiohalorhabdaceae</i>                                                                  | 0.159                      |
| <i>Pseudoalteromonadaceae</i>                                                              | 0.339                      |

1056

1057

1058

1059

1060

1061

1062

1063

1064

1065 Table S4:

| Table S4 Relative Abundances of Vibrionaceae                                                                   |                                    |                                            |                                            |                                                    |
|----------------------------------------------------------------------------------------------------------------|------------------------------------|--------------------------------------------|--------------------------------------------|----------------------------------------------------|
| Relative abundance (%) of <i>Vibrio shilonii</i> in adults and larvae at time point of larval release          |                                    |                                            |                                            |                                                    |
|                                                                                                                | MPA adult                          | MPA larvae                                 | Fished area adult                          | Fished area larvae                                 |
| mean                                                                                                           | 0.00                               | 0.00                                       | 0.15                                       | 0.02                                               |
| standard error                                                                                                 | 0.00                               | 0.00                                       | 0.07                                       | 0.01                                               |
| Relative abundance (%) of <i>Vibrio shilonii</i> in water collected from the MPA or fished area                |                                    |                                            |                                            |                                                    |
|                                                                                                                | MPA water                          | Fished area water                          |                                            |                                                    |
| mean                                                                                                           | 0.32                               | 0.53                                       |                                            |                                                    |
| standard error                                                                                                 | 0.12                               | 0.14                                       |                                            |                                                    |
| Relative abundance (%) of <i>Vibrio shilonii</i> in larvae maintained in MPA or fished area water for six days |                                    |                                            |                                            |                                                    |
|                                                                                                                | MPA larvae maintained in MPA water | MPA Larvae maintained in fished area water | Fished area larvae maintained in MPA water | Fished area larvae maintained in fished area water |
| mean                                                                                                           | 0.00                               | 0.01                                       | 4.16                                       | 0.28                                               |
| standard error                                                                                                 | 0.00                               | 0.01                                       | 4.14                                       | 0.17                                               |
| Relative abundance (%) of <i>Vibrionaceae</i> in adults and larvae at time point of larval release             |                                    |                                            |                                            |                                                    |
|                                                                                                                | MPA adult                          | MPA larvae                                 | Fished area adult                          | Fished area larvae                                 |
| mean                                                                                                           | 0.00                               | 0.13                                       | 0.29                                       | 1.33                                               |
| standard error                                                                                                 | 0.00                               | 0.13                                       | 0.15                                       | 0.64                                               |
| Relative abundance (%) of <i>Vibrionaceae</i> in water collected from the MPA or fished area                   |                                    |                                            |                                            |                                                    |
|                                                                                                                | MPA water                          | Fished area water                          |                                            |                                                    |
| mean                                                                                                           | 2.08                               | 0.93                                       |                                            |                                                    |
| standard error                                                                                                 | 0.66                               | 0.39                                       |                                            |                                                    |
| Relative abundance (%) of <i>Vibrionaceae</i> in larvae maintained in MPA or fished area water for six days    |                                    |                                            |                                            |                                                    |
|                                                                                                                | MPA larvae maintained in MPA water | MPA Larvae maintained in fished area water | Fished area larvae maintained in MPA water | Fished area larvae maintained in fished area water |
| mean                                                                                                           | 0.75                               | 0.51                                       | 4.37                                       | 1.65                                               |
| standard error                                                                                                 | 0.66                               | 0.46                                       | 4.30                                       | 0.89                                               |

1066
